# Supplementary material
Source: PubMed Central journal article supplement (PMC5406239)
Supplement: NIHMS847199-supplement-2.pdf [file NIHMS847199-supplement-2.pdf]

# SUPPLEMENTARY FIGURE 2

## MAT1A-KO + vehicle vs. WT + vehicle    MAT1A-KO + SAME vs. MAT1A-KO + vehicle

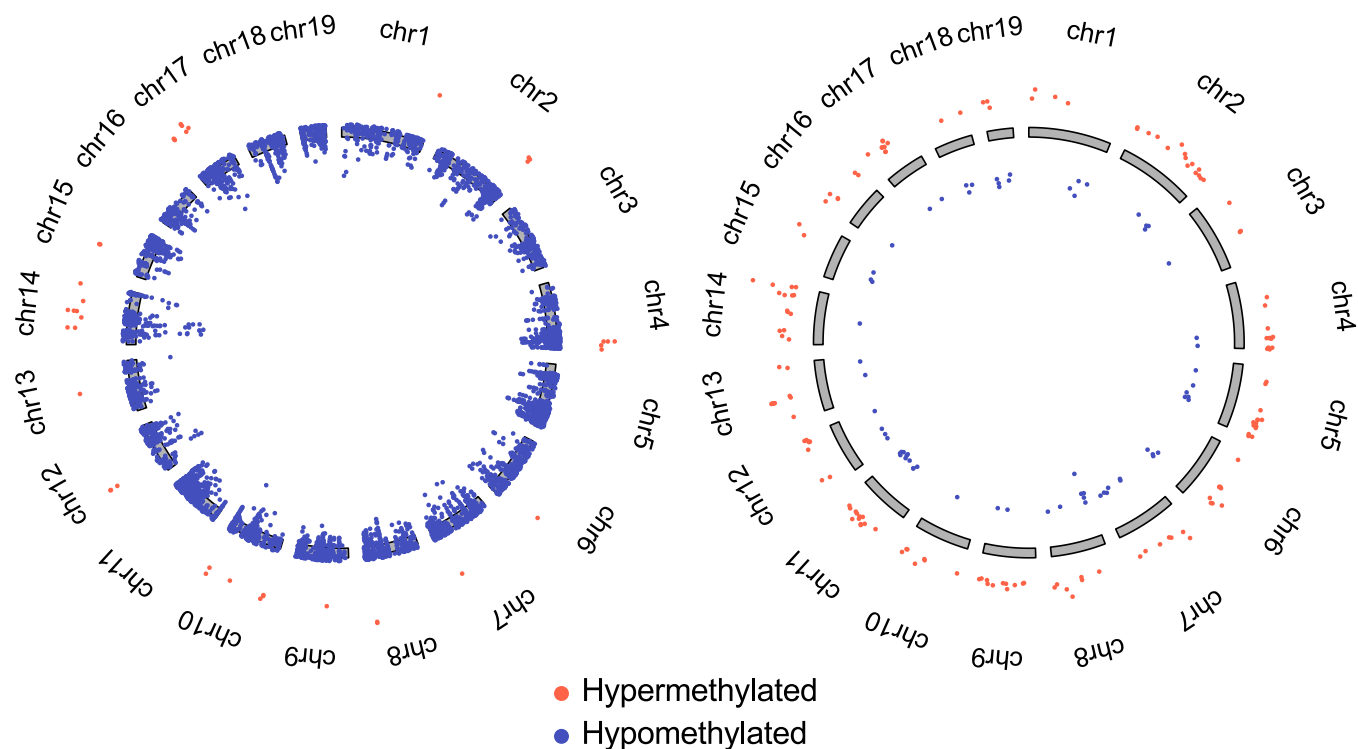

| DMR*                   | MAT1A-KO + vehicle<br>vs. WT + vehicle | MAT1A-KO + SAME<br>vs. WT + vehicle | MAT1A-KO + SAME<br>vs. MAT1A-KO + vehicle |
|------------------------|----------------------------------------|-------------------------------------|-------------------------------------------|
| <b>Hypermethylated</b> | 43                                     | 53                                  | 161                                       |
| <b>Hypomethylated</b>  | 6678                                   | 5330                                | 69                                        |
| <b>Total</b>           | 6721                                   | 5383                                | 230                                       |

\*Filtering parameters: Q-value < .05, methylation difference > 20%
