# Supplementary material
Source: PubMed Central journal article supplement (PMC5406239)

# SUPPLEMENTARY FIGURE 1

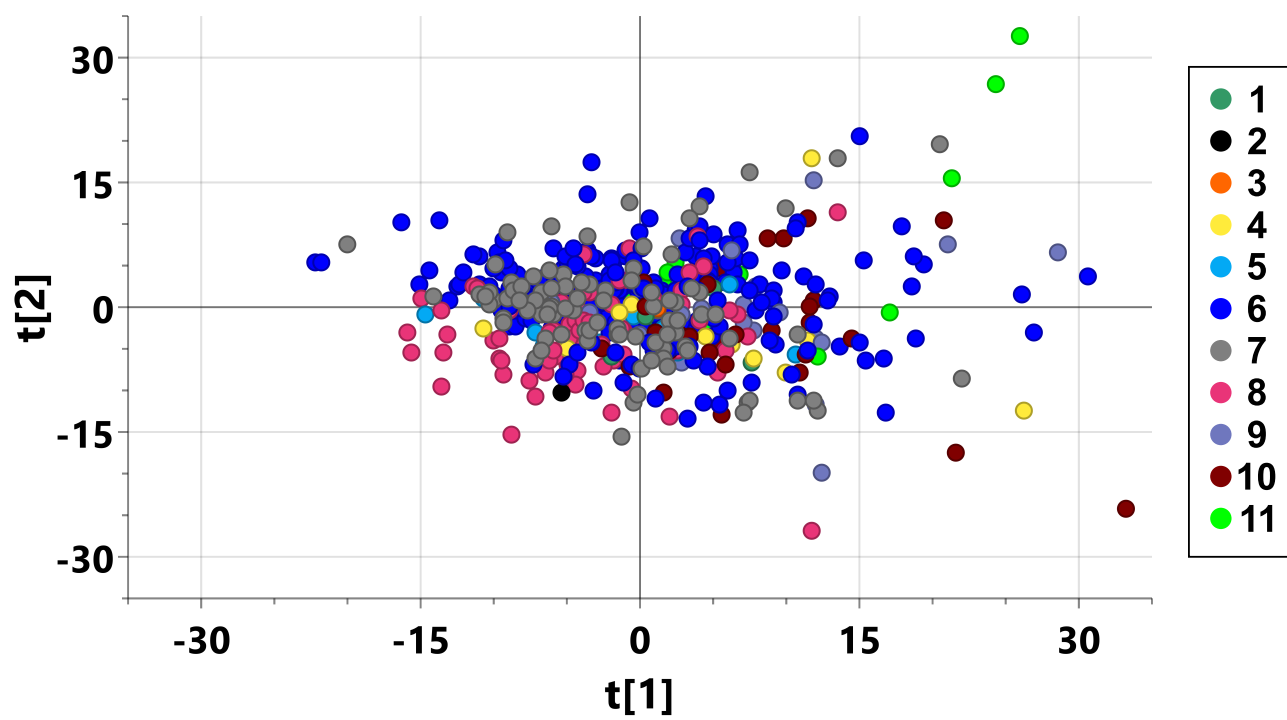

Supplement: NIHMS847199-supplement-1.pdf [file NIHMS847199-supplement-1.pdf]

# SUPPLEMENTARY FIGURE 3

## A

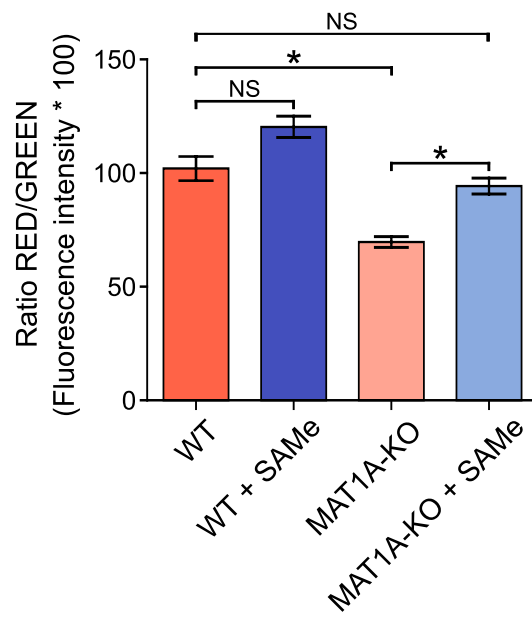

## B

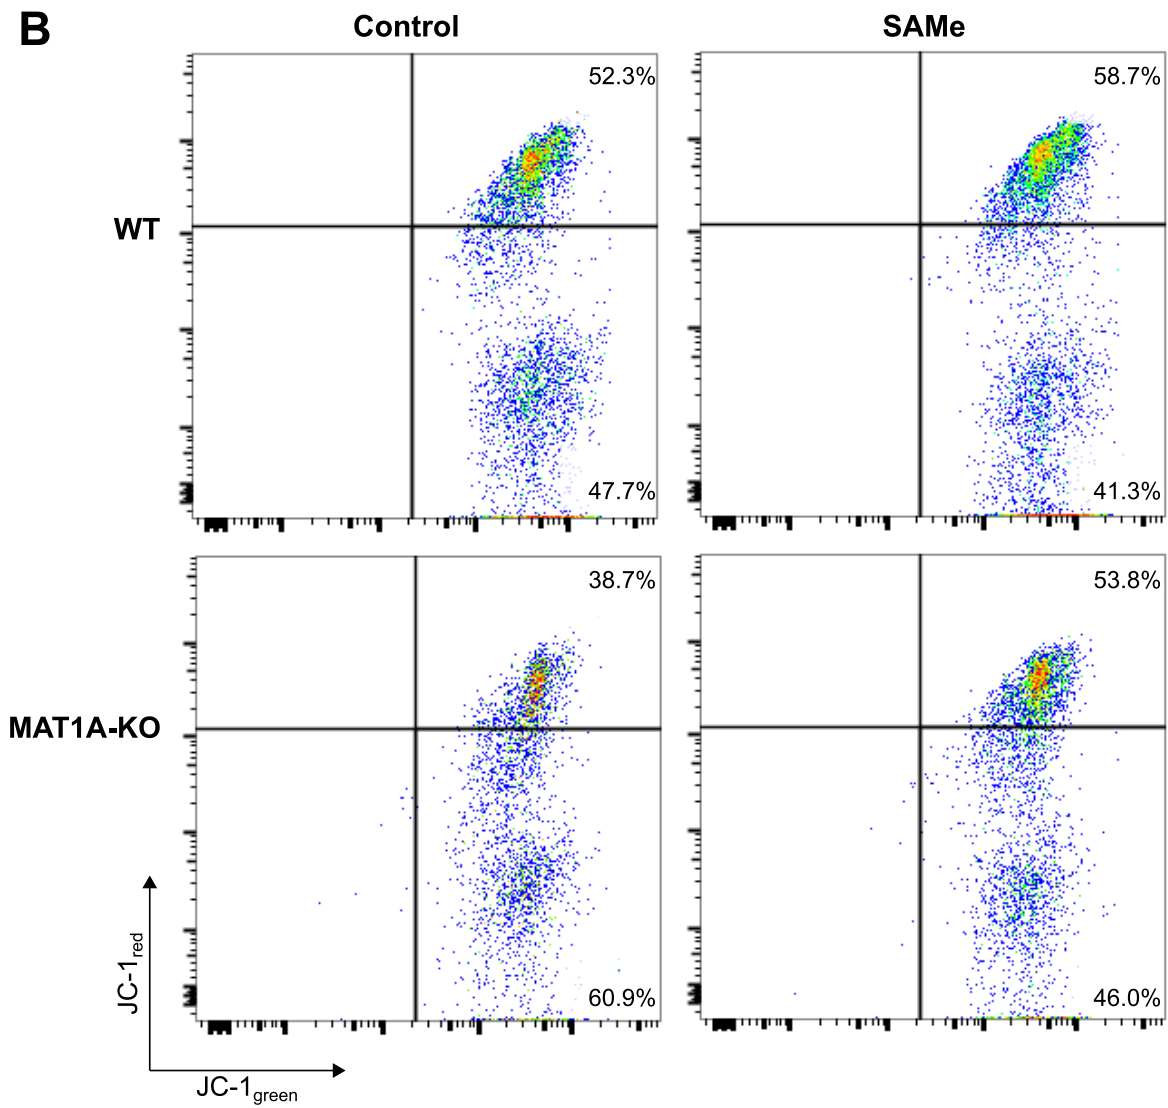

Supplement: NIHMS847199-supplement-3.pdf [file NIHMS847199-supplement-3.pdf]

SUPPLEMENTARY FIGURE 4

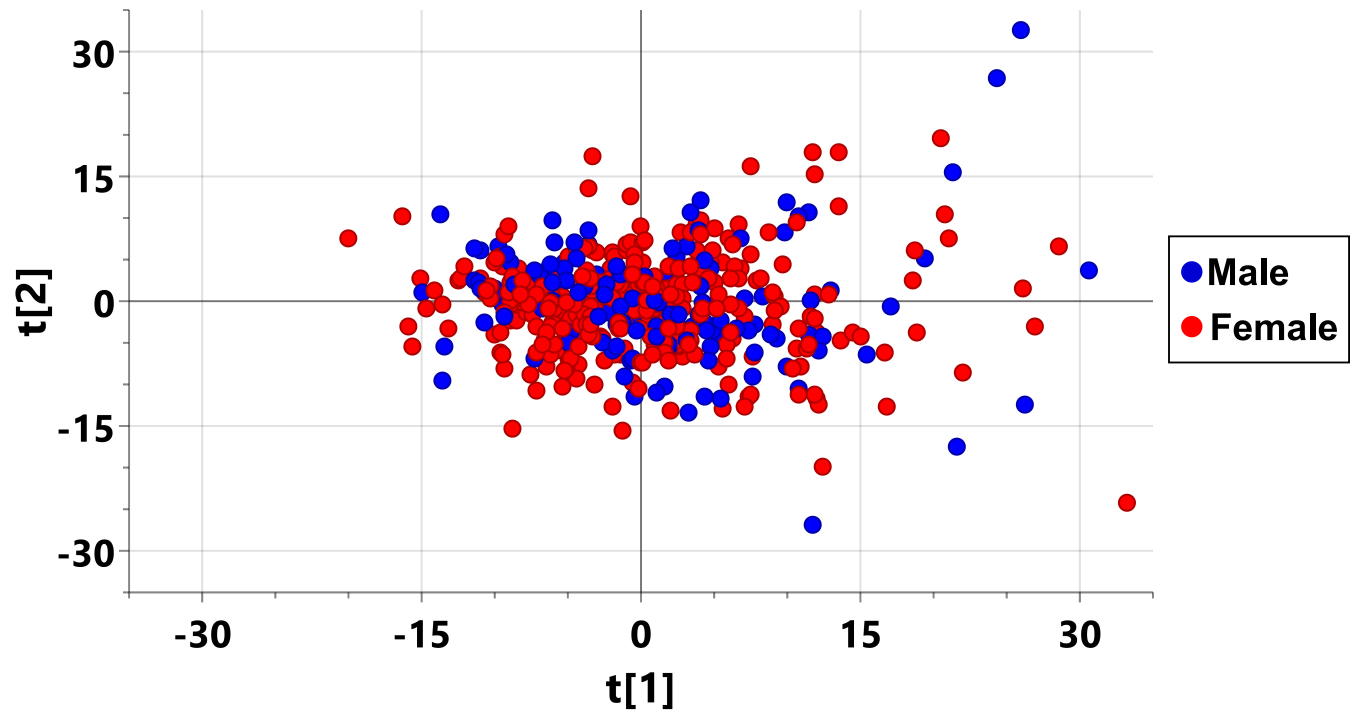

Supplement: NIHMS847199-supplement-4.pdf [file NIHMS847199-supplement-4.pdf]
